# Supplementary material for: Intense natural selection preceded the invasion of new adaptive zones during the radiation of New World leaf-nosed bats
Source: Springer Nature journal article supplement (doi:10.1038/s41598-017-08989-6), 2017-09-05
Supplement: 41598_2017_8989_MOESM1_ESM.pdf [file 41598_2017_8989_MOESM1_ESM.pdf]

## Supplementary Information Appendix

### “Intense natural selection preceded the invasion of new adaptive zones during the radiation of New World leaf-nosed bats”

Daniela M. Rossoni<sup>1\*</sup>, Ana Paula A. Assis<sup>2</sup>, Norberto P. Giannini<sup>3</sup> and Gabriel Marroig<sup>1</sup>

<sup>1</sup>Department of Genetics and Evolutionary Biology, Biosciences Institute, University of São Paulo, Rua do Matão, 277, 05508-900, São Paulo, Brazil.

<sup>2</sup>Department of Ecology, Biosciences Institute, University of São Paulo, Rua do Matão, 277, 05508-900, São Paulo, Brazil.

<sup>3</sup>Unidad Ejecutora Lillo-CONICET, Miguel Lillo 251, Universidad Nacional de Tucumán, CP 4000, Argentina.

\*Corresponding author: Daniela M. Rossoni, [daniela.rossoni@usp.br](mailto:daniela.rossoni@usp.br)

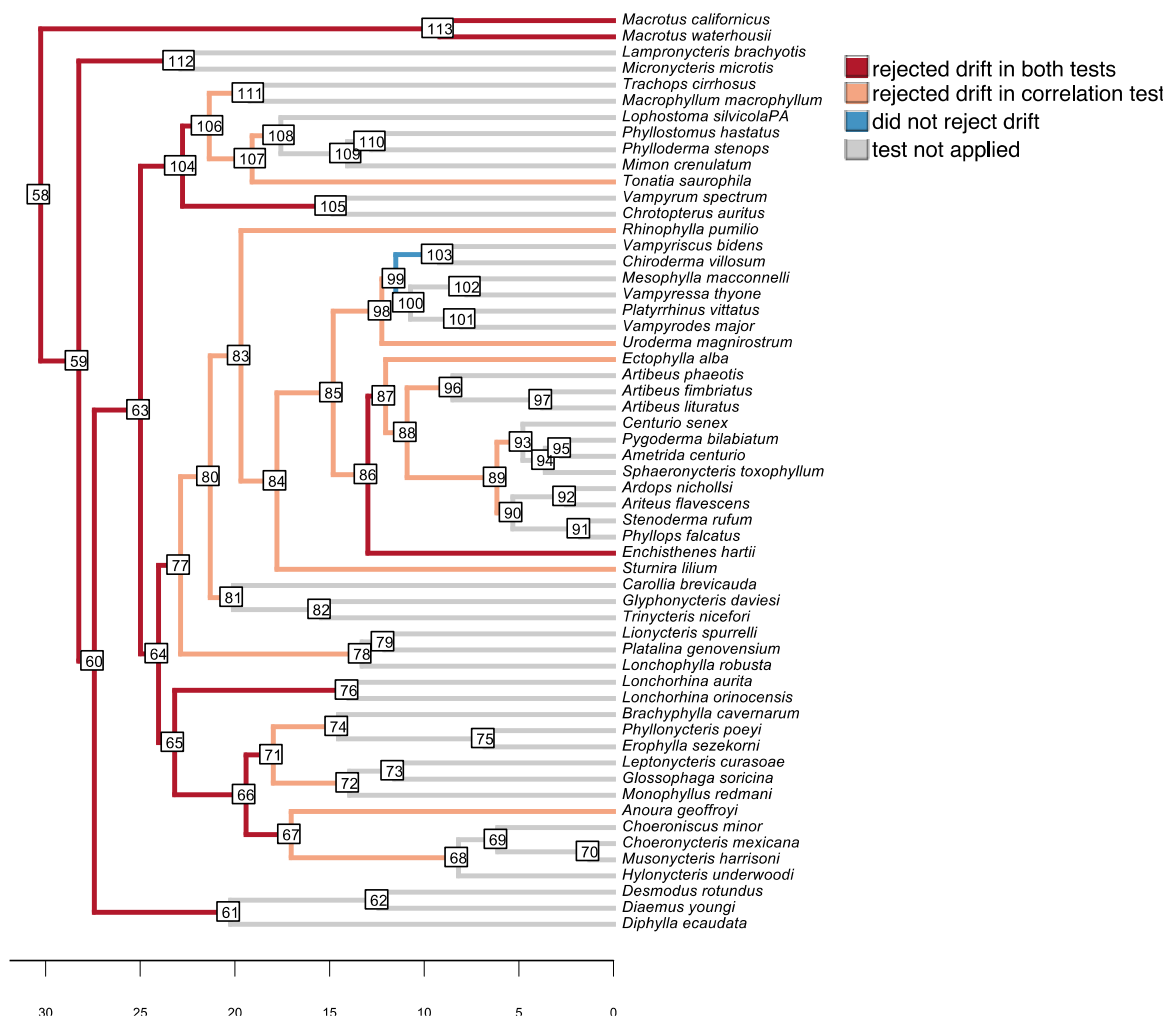

**Figure S1.** Results of genetic drift tests plotted on a phylogenetic tree for Phyllostomidae. Tests were not applied to nodes encompassing <5 terminal taxa (branches in gray). Phylogeny based on Rojas<sup>1</sup>. Scale bar: million years (Myr).

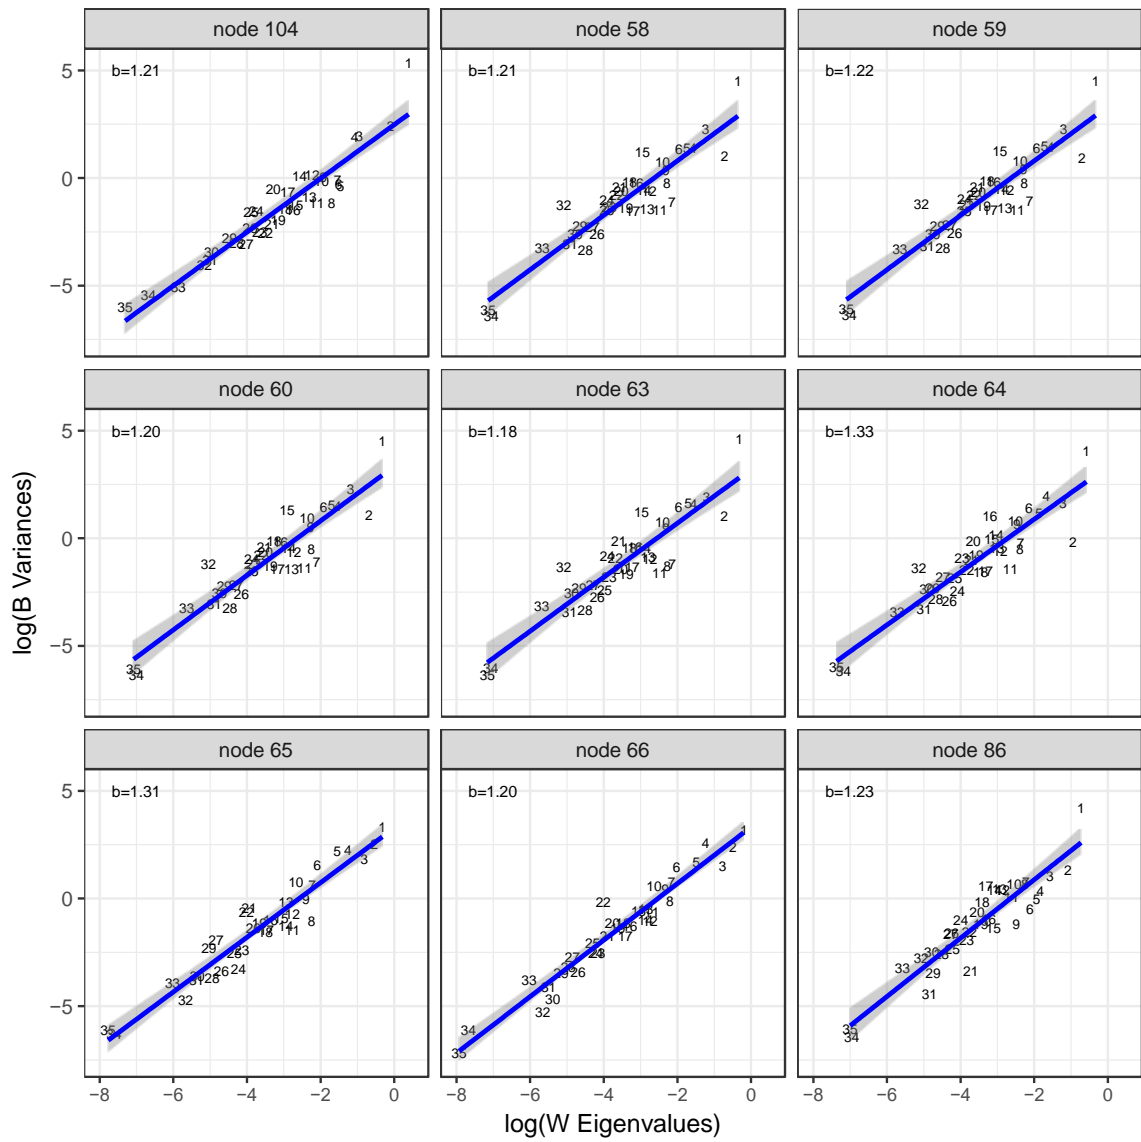

**Figure S2.** Regression test plots of between-groups variances (**B**) on within-group eigenvalues (**W**) and the associated 95% confidence intervals for nodes in the phylogeny where the genetic drift has been rejected. The blue line represents the estimated regression line with respective confidence interval. Regression slopes ( $b$ ) are displayed in the left upper corner. Number labels inside the plots represent the principal components.

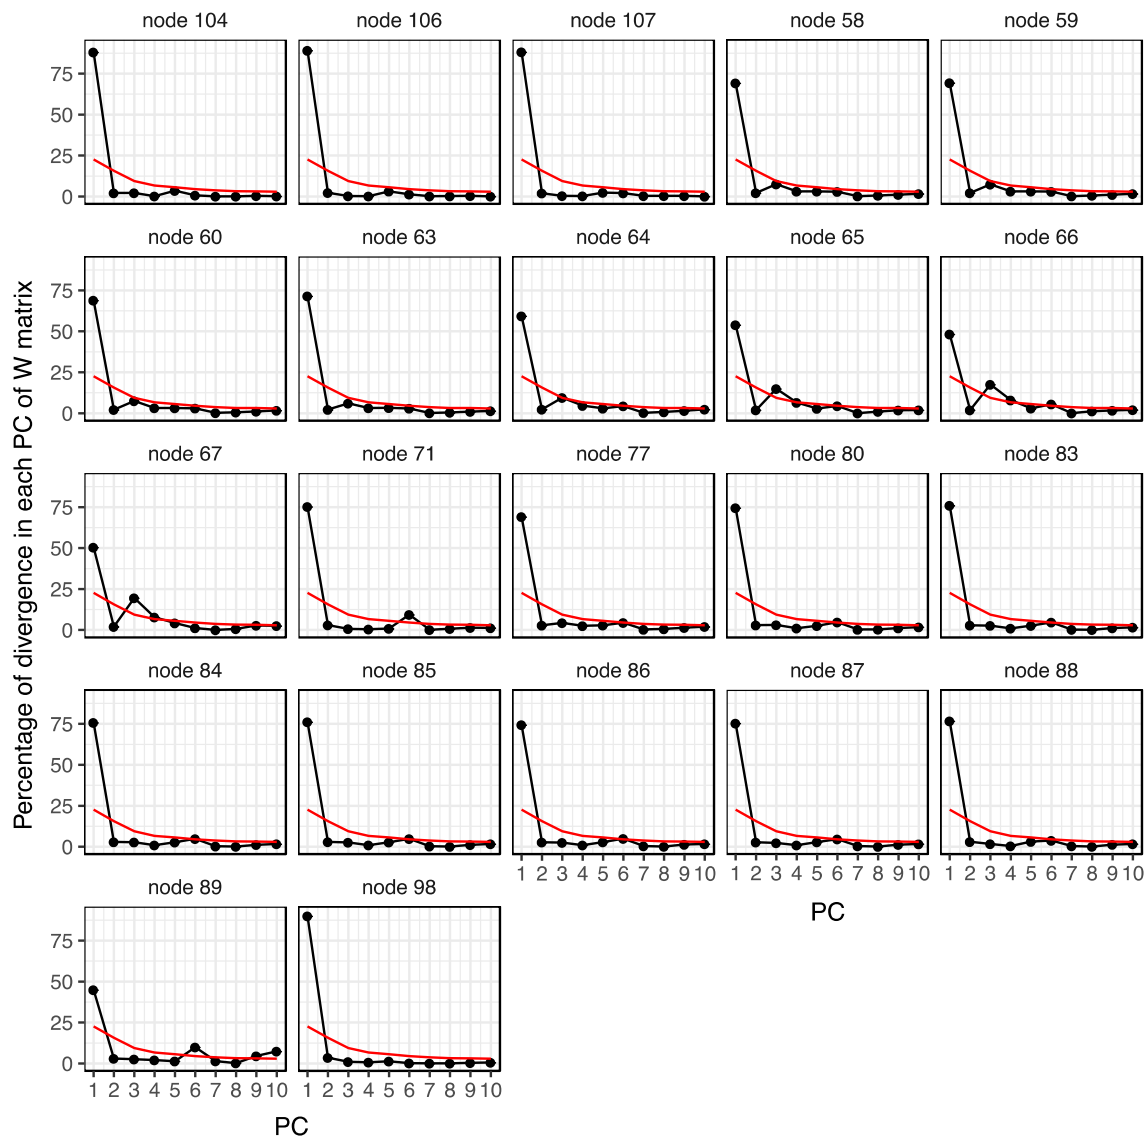

**Figure S3.** Directions of divergence between species (**B**) projected in the first 10 PCs of the ancestral **W**-matrix (black lines and dots). Red lines indicate the percentage of variance explained by each PC of the ancestral **W**-matrix (see Table S1). Note that most of the divergence observed between phyllostomid species is associated with the first principal component.

**Table S1.** Eigenvectors for the 10 PCs estimated from the ancestral **W**-matrix (node 58 in the Phyllostomidae phylogeny showed in Figure S1). The first column represents linear distances between the landmarks displayed in Figure S6. The regions and subregions, representing functional/developmental groups are also displayed. Boldface indicates the most extreme loading values.

| Distances | Region                   | Subregion          | PC1    | PC2           | PC3           | PC4           | PC5           | PC6           | PC7           | PC8           | PC9           | PC10          |
|-----------|--------------------------|--------------------|--------|---------------|---------------|---------------|---------------|---------------|---------------|---------------|---------------|---------------|
| ISPM      | Oral                     | Face               | -0.032 | 0.010         | 0.007         | -0.004        | -0.041        | -0.016        | -0.002        | -0.036        | -0.008        | -0.025        |
| ISNSL     | Nasal                    | Face               | -0.087 | 0.026         | -0.004        | 0.056         | -0.047        | -0.050        | 0.053         | <b>0.105</b>  | 0.069         | -0.024        |
| ISPNS     | Oral, Nasal              | Face               | -0.275 | 0.083         | <b>-0.114</b> | -0.059        | <b>-0.348</b> | <b>-0.357</b> | -0.006        | 0.019         | <b>0.206</b>  | <b>-0.241</b> |
| PMZS      | Oral                     | Face               | -0.238 | <b>0.113</b>  | <b>-0.338</b> | 0.063         | 0.062         | 0.012         | 0.087         | <b>0.112</b>  | <b>-0.211</b> | -0.088        |
| PMZI      | Oral                     | Face               | -0.233 | <b>0.101</b>  | <b>-0.350</b> | 0.027         | <b>0.162</b>  | -0.004        | 0.040         | 0.051         | 0.020         | 0.047         |
| PMMT      | Oral                     | Face               | -0.194 | 0.052         | <b>-0.128</b> | -0.038        | <b>-0.102</b> | -0.023        | 0.043         | 0.085         | -0.065        | -0.083        |
| NSLNA     | Nasal                    | Face               | -0.135 | <b>-0.144</b> | <b>-0.219</b> | <b>-0.669</b> | <b>-0.186</b> | <b>0.230</b>  | <b>-0.241</b> | <b>-0.182</b> | -0.040        | -0.005        |
| NSLZS     | Nasal                    | Face               | -0.242 | <b>0.107</b>  | <b>-0.299</b> | 0.025         | 0.049         | 0.029         | 0.070         | 0.055         | <b>-0.241</b> | -0.051        |
| NSLZI     | Oral, Nasal              | Face               | -0.258 | 0.088         | <b>-0.306</b> | -0.003        | <b>0.116</b>  | 0.022         | 0.021         | 0.040         | -0.007        | <b>0.118</b>  |
| NABR      | Cranial vault            | Neurocranium       | -0.037 | <b>0.759</b>  | <b>0.213</b>  | <b>0.219</b>  | -0.031        | 0.044         | -0.040        | 0.014         | -0.168        | -0.038        |
| NAPNS     | Nasal                    | Face               | -0.181 | 0.063         | -0.025        | 0.077         | <b>-0.203</b> | <b>-0.264</b> | -0.040        | <b>0.148</b>  | <b>0.361</b>  | -0.030        |
| BRPT      | Cranial vault            | Neurocranium       | -0.054 | <b>0.375</b>  | <b>0.109</b>  | <b>-0.136</b> | -0.095        | <b>0.243</b>  | <b>-0.404</b> | <b>-0.191</b> | 0.086         | <b>0.164</b>  |
| BRAPET    | Cranial vault            | Neurocranium       | -0.210 | -0.034        | 0.079         | <b>0.161</b>  | <b>-0.136</b> | <b>0.299</b>  | <b>-0.160</b> | 0.036         | <b>0.320</b>  | <b>0.125</b>  |
| PTAPET    | Cranial vault            | Neurocranium       | -0.252 | -0.046        | <b>0.222</b>  | -0.071        | <b>0.198</b>  | <b>0.147</b>  | <b>0.118</b>  | <b>0.120</b>  | <b>0.311</b>  | <b>-0.126</b> |
| PTBA      | Cranial vault            | Neurocranium       | -0.297 | -0.042        | <b>0.214</b>  | -0.075        | <b>0.138</b>  | -0.090        | -0.009        | -0.058        | 0.026         | <b>0.170</b>  |
| PTEAM     | Cranial vault            | Neurocranium       | -0.233 | -0.034        | <b>0.240</b>  | -0.093        | <b>0.204</b>  | <b>-0.129</b> | <b>0.129</b>  | <b>-0.228</b> | -0.061        | <b>-0.186</b> |
| PTZYGO    | Zygomatic                | Face               | -0.216 | -0.060        | <b>0.179</b>  | <b>-0.100</b> | <b>0.107</b>  | <b>-0.112</b> | <b>0.194</b>  | <b>0.183</b>  | <b>-0.123</b> | <b>0.201</b>  |
| PTTSP     | Cranial vault, Zygomatic | Neurocranium, Face | -0.170 | -0.028        | <b>0.202</b>  | <b>-0.104</b> | <b>0.223</b>  | <b>-0.114</b> | <b>0.139</b>  | 0.036         | 0.089         | 0.059         |
| ZSZI      | Oral                     | Face               | -0.057 | -0.017        | 0.008         | 0.008         | -0.083        | 0.023         | -0.041        | <b>0.114</b>  | 0.033         | 0.078         |
| ZIMT      | Oral                     | Face               | -0.081 | 0.034         | <b>-0.127</b> | 0.032         | <b>0.107</b>  | 0.027         | 0.032         | -0.016        | 0.048         | 0.084         |

|                    |               |              |        |               |              |               |               |               |               |               |               |               |
|--------------------|---------------|--------------|--------|---------------|--------------|---------------|---------------|---------------|---------------|---------------|---------------|---------------|
| ZIZYGO             | Zygomatic     | Face         | -0.061 | -0.054        | <b>0.292</b> | <b>-0.141</b> | <b>-0.417</b> | 0.009         | 0.099         | <b>0.327</b>  | <b>-0.337</b> | -0.015        |
| ZITSP              | Zygomatic     | Face         | -0.075 | -0.005        | <b>0.170</b> | -0.079        | <b>-0.336</b> | 0.048         | 0.075         | 0.072         | <b>-0.191</b> | <b>-0.209</b> |
| MTPNS              | Oral          | Face         | -0.074 | 0.029         | 0.018        | -0.021        | <b>-0.180</b> | <b>-0.170</b> | -0.016        | -0.057        | <b>0.114</b>  | <b>-0.134</b> |
| PNSAPET            | Basicranium   | Neurocranium | -0.097 | 0.005         | 0.038        | -0.016        | 0.096         | <b>0.553</b>  | <b>0.164</b>  | <b>0.196</b>  | <b>-0.154</b> | <b>-0.183</b> |
| APETBA             | Basicranium   | Neurocranium | -0.055 | 0.003         | -0.008       | -0.001        | -0.064        | <b>-0.235</b> | <b>-0.131</b> | <b>-0.176</b> | <b>-0.282</b> | <b>0.305</b>  |
| APETTS             | Basicranium   | Neurocranium | -0.040 | 0.010         | 0.043        | -0.054        | 0.033         | <b>0.197</b>  | <b>0.105</b>  | 0.067         | <b>0.160</b>  | <b>-0.256</b> |
| BAEAM              | Basicranium   | Neurocranium | -0.126 | 0.003         | 0.008        | -0.018        | -0.088        | 0.054         | -0.051        | <b>0.196</b>  | 0.083         | <b>0.320</b>  |
| EAMZYGO            | Zygomatic     | Face         | -0.054 | 0.040         | -0.015       | 0.065         | -0.004        | 0.019         | 0.000         | <b>-0.454</b> | -0.005        | <b>-0.482</b> |
| ZYGOTSP            | Zygomatic     | Face         | -0.079 | -0.011        | -0.009       | 0.010         | -0.097        | 0.013         | 0.043         | 0.028         | <b>-0.125</b> | -0.012        |
| LDAS               | Cranial vault | Neurocranium | -0.068 | 0.050         | -0.003       | 0.095         | <b>-0.247</b> | <b>0.199</b>  | <b>0.417</b>  | <b>-0.303</b> | <b>0.188</b>  | <b>0.237</b>  |
| BRLD               | Cranial vault | Neurocranium | -0.275 | <b>-0.426</b> | 0.017        | <b>0.591</b>  | <b>-0.180</b> | <b>0.159</b>  | <b>-0.231</b> | <b>-0.150</b> | <b>-0.178</b> | -0.005        |
| OPILD              | Cranial vault | Neurocranium | -0.086 | 0.050         | 0.021        | -0.044        | <b>-0.180</b> | 0.076         | <b>0.414</b>  | <b>-0.385</b> | -0.010        | <b>0.277</b>  |
| PTAS               | Cranial vault | Neurocranium | -0.322 | -0.038        | <b>0.280</b> | -0.057        | <b>0.240</b>  | -0.082        | <b>-0.269</b> | <b>-0.166</b> | <b>-0.172</b> | -0.021        |
| JPAS               | Basicranium   | Neurocranium | -0.065 | 0.004         | 0.010        | 0.011         | 0.004         | 0.012         | <b>-0.248</b> | 0.055         | -0.021        | 0.045         |
| BAOPI              | Basicranium   | Neurocranium | -0.045 | 0.015         | 0.022        | 0.035         | -0.010        | 0.094         | <b>-0.180</b> | <b>0.148</b>  | <b>0.189</b>  | -0.032        |
| <b>Eigenvalues</b> |               |              | 0.70   | 0.48          | 0.29         | 0.20          | 0.17          | 0.14          | 0.11          | 0.10          | 0.09          | 0.09          |
| <b>% variance</b>  |               |              | 29.16  | 20.00         | 12.00        | 8.33          | 7.08          | 5.83          | 5.00          | 4.16          | 4.08          | 3.75          |

**Table S2.** Projection of species means on the first principal component of ancestral **W**-matrix (node 58 in the Phyllostomidae phylogeny showed in Figure S1) and geometric means per species. The observed Pearson correlation between PC1 and geometric mean is 0.97, indicating that PC1 is an allometric size component.

| <b>Species</b>             | <b>Geometric_mean</b> | <b>PC1 W58</b> |
|----------------------------|-----------------------|----------------|
| Ametrida_centurio          | 3.64                  | 24.53          |
| Anoura_geoffroyi           | 5.05                  | 40.15          |
| Ardops_nicholli            | 5.12                  | 35.11          |
| Ariteus_flavescens         | 4.44                  | 30.14          |
| Artibeus_fimbriatus        | 7.07                  | 51.76          |
| Artibeus_lituratus         | 7.13                  | 51.46          |
| Artibeus_phaeotis          | 4.53                  | 32.12          |
| Brachyphylla_cavernarum    | 6.57                  | 48.23          |
| Carollia_brevicauda        | 4.85                  | 34.90          |
| Centurio_senex             | 4.83                  | 32.15          |
| Chiroderma_villosum        | 5.73                  | 41.20          |
| Choeroniscus_minor         | 4.21                  | 36.07          |
| Choeronycteris_mexicana    | 5.27                  | 44.98          |
| Chropterus_auritus         | 7.60                  | 55.45          |
| Desmodus_rotundus          | 5.41                  | 38.37          |
| Diaemus_youngi             | 5.40                  | 36.77          |
| Diphylla_ecaudata          | 4.97                  | 33.99          |
| Ectophylla_alba            | 3.80                  | 27.04          |
| Enchisthenes_hartii        | 4.63                  | 33.42          |
| Erophylla_sezekorni        | 4.66                  | 35.39          |
| Glossophaga_soricina       | 4.11                  | 31.60          |
| Glyphonycteris_daviesi     | 5.66                  | 41.44          |
| Hlonycteris_underwoodi     | 4.10                  | 33.05          |
| Lampronnycteris_brachyotis | 4.54                  | 33.09          |
| Leptonnycteris_curasoae    | 5.29                  | 41.56          |
| Lionnycteris_spurrelli     | 3.88                  | 29.72          |
| Lonchophylla_robusta       | 5.17                  | 40.97          |
| Lonchorhina_aurita         | 4.29                  | 30.72          |
| Lonchorhina_orinocensis    | 3.82                  | 27.84          |
| Lophostoma_silvicolum      | 5.59                  | 40.15          |
| Macrophyllum_macrophyllum  | 3.60                  | 25.75          |
| Macrotus_californicus      | 4.48                  | 33.82          |
| Macrotus_waterhousii       | 4.46                  | 33.42          |
| Mesophylla_macconnelli     | 3.90                  | 28.00          |
| Micronnycteris_microtis    | 3.73                  | 27.29          |
| Gardnermycteris_crenulatum | 4.50                  | 32.39          |
| Monophyllus_redmani        | 4.51                  | 34.70          |
| Musonycteris_harrisoni     | 5.37                  | 48.27          |
| Phylloderma_stenops        | 6.54                  | 46.50          |

|                             |       |       |
|-----------------------------|-------|-------|
| Phyllonycteris_poeyi        | 4.74  | 35.68 |
| Phyllops_falcatus           | 4.60  | 31.97 |
| Phyllostomus_hastatus       | 8.08  | 58.48 |
| Platalina_genovensium       | 5.65  | 45.99 |
| Platyrrhinus_vittatus       | 7.17  | 52.52 |
| Pygoderma_bilabiatum        | 4.74  | 32.78 |
| Rhinophylla_pumilio         | 3.95  | 28.51 |
| Sphaeronycteris_toxophyllum | 4.04  | 27.44 |
| Stenoderma_rufum            | 5.06  | 34.13 |
| Sturnira_lilium             | 5.05  | 36.46 |
| Tonatia_saurophila          | 5.85  | 41.79 |
| Trachops_cirrhosus          | 6.04  | 44.37 |
| Trinycteris_nicefori        | 4.12  | 30.33 |
| Uroderma_magnirostrum       | 5.24  | 38.94 |
| Vampyriscus_bidens          | 4.39  | 31.51 |
| Vampyressa_thyone           | 4.11  | 29.27 |
| Vampyroides_major           | 6.46  | 46.16 |
| Vampyrum_spectrum           | 10.10 | 75.37 |

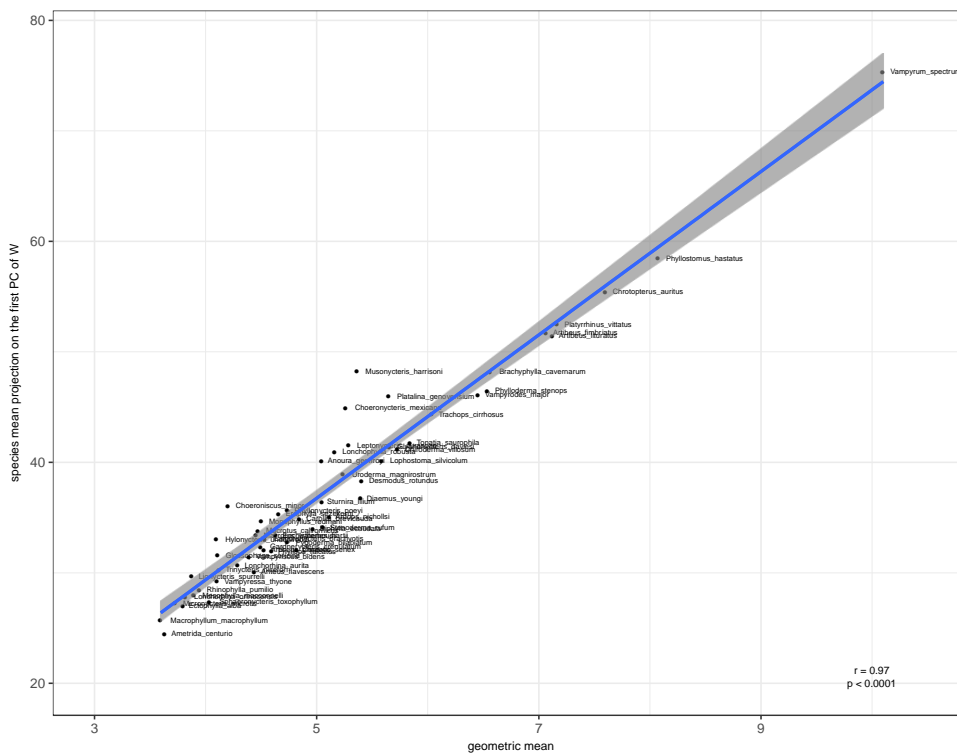

**Figure S4.** Correlation between projection of species means on the first principal component of ancestral **W**-matrix (node 58 in the Phyllostomidae phylogeny showed in Figure S1) and geometric means.

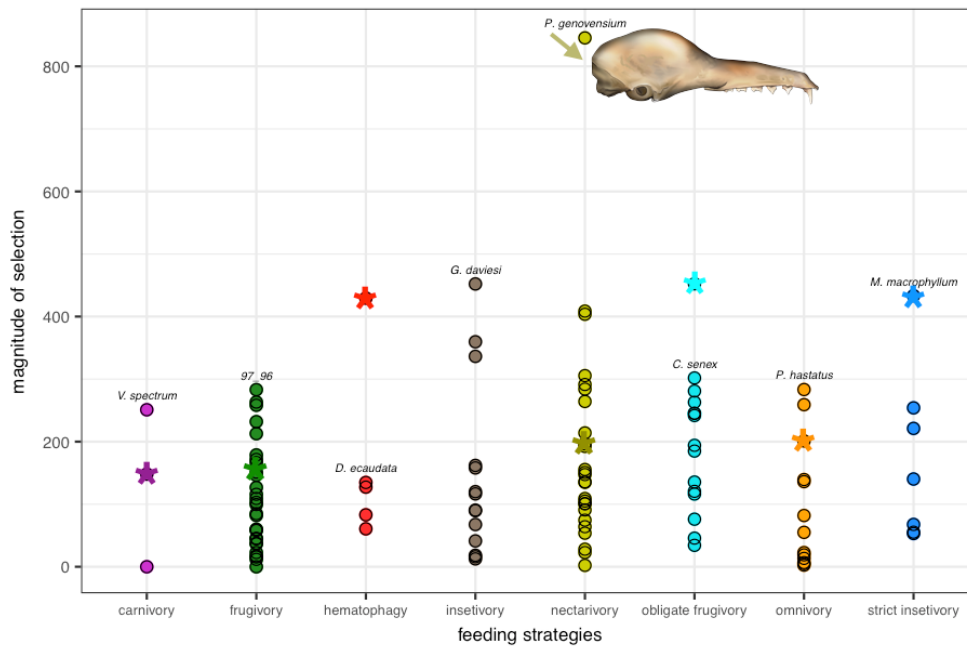

**Figure S5.** Distribution of the magnitude of selection, estimated as the norm of the selection gradient vector, in eight dietary categories. Circles indicate branches in the phylogeny, and the symbol (\*) indicates dietary transitions. Species names correspond to greatest magnitudes of selection for each feeding strategies (*Vampyrum spectrum*: carnivory; *Ectophylla alba*: frugivory; *Diphylla ecaudata*: hematophagy; *Glyphonycteris daviesi*: insetivory; *Platalina genovensium*: nectarivory; *Centurio senex*: obligate frugivory; *Phyllostomus hastatus*: omnivory; *Macrophyllum macrophyllum*: strict insetivory). Skull: *Platalina genovensium*. Dietary information was obtained from the literature based on Nowak<sup>2</sup>, Ferrarezi and Gimenez<sup>3</sup>, Simmons<sup>4</sup>, Wetterer et al.<sup>5</sup>, Baker et al.<sup>6</sup>, and supplemented by personal experience (N. P. Giannini).



**Table S3.** 57 species of phyllostomid bats measured in this study, with respective sample sizes (N). Sources of variation controlled during the pooled within-species variance-covariance matrix estimation are presented. S: sex, L: locality.

| Species                            | Model | N  | Species                          | Model | N  |
|------------------------------------|-------|----|----------------------------------|-------|----|
| <i>Micronycteris microtis</i>      | -     | 60 | <i>Ariteus flavescens</i>        | S     | 59 |
| <i>Lampronnycteris brachyotis</i>  | -     | 14 | <i>Phyllops falcatus</i>         | S + L | 50 |
| <i>Lonchorhina aurita</i>          | -     | 39 | <i>Stenoderma rufum</i>          | S     | 60 |
| <i>Lonchorhina orinocensis</i>     | S     | 40 | <i>Enchisthenes hartii</i>       | S + L | 62 |
| <i>Lonchophylla robusta</i>        | S     | 68 | <i>Chiroderma villosum</i>       | S     | 60 |
| <i>Lionycteris spurrelli</i>       | -     | 60 | <i>Vampyriscus bidens</i>        | -     | 48 |
| <i>Platalina genovensium</i>       | -     | 6  | <i>Uroderma magnirostrum</i>     | -     | 60 |
| <i>Monophyllus redmani</i>         | S     | 58 | <i>Vampyressa thyone</i>         | S + L | 62 |
| <i>Leptonycteris curasoae</i>      | S     | 61 | <i>Mesophylla macconnelli</i>    | S + L | 60 |
| <i>Glossophaga soricina</i>        | -     | 35 | <i>Vampyroides major</i>         | -     | 62 |
| <i>Brachyphylla cavernarum</i>     | S + L | 52 | <i>Platyrrhinus vittatus</i>     | -     | 59 |
| <i>Erophylla sezekorni</i>         | S     | 60 | <i>Glyphonycteris daviesi</i>    | -     | 4  |
| <i>Phyllonycteris poeyi</i>        | S     | 60 | <i>Trinycteris nicefori</i>      | -     | 61 |
| <i>Anoura geoffroyi</i>            | -     | 39 | <i>Carollia brevicauda</i>       | S     | 69 |
| <i>Hylonycteris underwoodi</i>     | -     | 31 | <i>Macrophyllum macrophyllum</i> | S + L | 51 |
| <i>Choeronycteris mexicana</i>     | -     | 51 | <i>Trachops cirrhosus</i>        | -     | 60 |
| <i>Musonycteris harrisoni</i>      | -     | 5  | <i>Tonatia saurophila</i>        | S + L | 50 |
| <i>Choeroniscus minor</i>          | -     | 33 | <i>Lophostoma silvicola</i>      | S + L | 70 |
| <i>Rhinophylla pumilio</i>         | S + L | 52 | <i>Phyllostomus hastatus</i>     | S + L | 64 |
| <i>Sturnira lilium</i>             |       | 33 | <i>Phylloderma stenops</i>       | S + L | 34 |
| <i>Artibeus lituratus</i>          | S     | 40 | <i>Mimon crenulatum</i>          | -     | 39 |
| <i>Artibeus fimbriatus</i>         | -     | 51 | <i>Chrotopterus auritus</i>      | S + L | 58 |
| <i>Artibeus phaeotis</i>           | -     | 45 | <i>Vampyrum spectrum</i>         | S + L | 41 |
| <i>Ectophylla alba</i>             | -     | 11 | <i>Diphylla ecaudata</i>         | S + L | 56 |
| <i>Centurio senex</i>              | S + L | 66 | <i>Diaemus youngi</i>            | S + L | 59 |
| <i>Sphaeronycteris toxophyllum</i> | S     | 64 | <i>Desmodus rotundus</i>         | S     | 86 |
| <i>Ametrida centurio</i>           | S + L | 48 | <i>Macrotus californicus</i>     | S     | 59 |
| <i>Pygoderma bilabiatum</i>        | S     | 57 | <i>Macrotus waterhousii</i>      | S     | 60 |
| <i>Ardops nichollsi</i>            | -     | 6  |                                  |       |    |

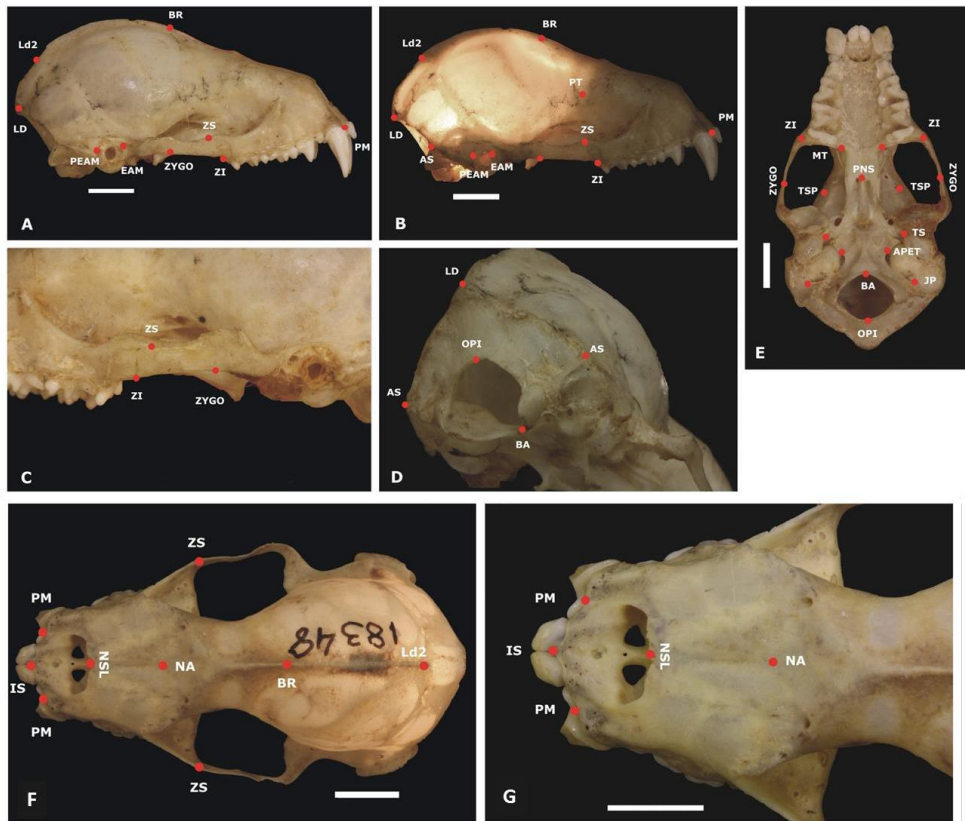

**Figure S6.** Cranial anatomical landmarks in *Chrotopterus auritus* (A-E; MZUSP 3077) and *Phyllostomus hastatus* (F-G; MZUSP 18348). A and B - lateral view. C - oblique dorsolateral view with jugal bone in detail. D - oblique occipital view. E - ventral view. F - dorsal view. G - dorsal view with nasal and frontal bones in detail. Scale bar = 5 mm.

**Table S4.** Anatomical landmarks recorded from skulls by using a 3D digitizer with descriptions and anatomical references. The anatomical references (bones and sutures involved) are based on Evans and Evans<sup>7</sup> and Giannini et al<sup>8</sup>. Names of the skull bones are given in English and the sutures are given in Latin terminology based on the fourth edition of the *Nomina Anatomica Veterinaria*<sup>9</sup>.

| Landmarks   | Descriptions                                  | Bones involved                    | Sutures involved                                       |
|-------------|-----------------------------------------------|-----------------------------------|--------------------------------------------------------|
| <b>IS</b>   | Intradentale superior                         | premaxilla                        | <i>sutura interincisiva</i>                            |
| <b>PM</b>   | Premaxillari-maxillari suture at the alveolus | premaxilla; maxilla               | <i>sutura maxilloincisiva</i>                          |
| <b>NSL</b>  | Nasale                                        | nasal                             | <i>sutura internasalis</i>                             |
| <b>NA</b>   | Nasion                                        | nasal; frontal                    | <i>sutura frontonasalis</i>                            |
| <b>BR</b>   | Bregma                                        | frontal; parietal                 | <i>sutura sagittalis; sutura coronalis</i>             |
| <b>PT</b>   | Pterion                                       | frontal; parietal; orbitosphenoid | <i>sutura sphenofrontalis; sutura sphenoparietalis</i> |
| <b>ZS</b>   | Zygomaxillare superior                        | maxilla; jugal                    | <i>sutura zygomaticomaxillaris</i>                     |
| <b>ZI</b>   | Zygomaxillare inferior                        | maxilla; jugal                    | <i>sutura zygomaticomaxillaris</i>                     |
| <b>MT</b>   | Maxillary tuberosity                          | palatine; maxilla                 | <i>sutura palatomaxillaris</i>                         |
| <b>PNS</b>  | Posterior nasal spine                         | palatine                          | <i>sutura interpalatina</i>                            |
| <b>APET</b> | Anterior petrous temporal                     | basisphenoid; basioccipital       | <i>spheno-occipital synchondrosis</i>                  |
| <b>BA</b>   | Basion                                        | basioccipital                     | -                                                      |
| <b>OPI</b>  | Opisthion                                     | supraoccipital                    | -                                                      |
| <b>EAM</b>  | External auditory meatus                      | maleus                            | -                                                      |
| <b>PEAM</b> | Posterior auditory meatus                     | maleus                            | -                                                      |
| <b>ZYGO</b> | Inferior zygo-temporal suture                 | jugal; squamosal                  | <i>sutura temporozygomatica</i>                        |
| <b>TSP</b>  | Temporo-spheno-parietal junction              | parietal; alisphenoid; squamosal  | <i>sutura squamosa; sutura sphenoparietalis</i>        |
| <b>TS</b>   | Temporo-sphenoidal junction at petrous        | squamosal; alisphenoid            | <i>sutura sphenosquamosa</i>                           |
| <b>JP</b>   | Jugular foramen                               | basioccipital; exoccipital        | <i>posterior basicochlear commissure</i>               |
| <b>LD</b>   | Lambda                                        | interparietal; supraoccipital     | <i>sutura occipitointerparietalis (lambdoidea)</i>     |
| <b>AS</b>   | Asterion                                      | parietal; supraoccipital          | <i>sutura occipitoparietalis</i>                       |

**Table S5.** 35 linear distances and its classification on functional/developmental group and skull regions.

| <b>Distances</b> | <b>Functional/Developmental group</b> | <b>Region</b>      |
|------------------|---------------------------------------|--------------------|
| IS-PM            | Oral                                  | Face               |
| IS-NSL           | Nasal                                 | Face               |
| IS-PNS           | Oral, Nasal                           | Face               |
| PM-ZS            | Oral                                  | Face               |
| PMZI             | Oral                                  | Face               |
| PM-MT            | Oral                                  | Face               |
| NSL-NA           | Nasal                                 | Face               |
| NSL-ZS           | Nasal                                 | Face               |
| NSL-ZI           | Oral, Nasal                           | Face               |
| NA-BR            | Cranial vault                         | Neurocranium       |
| NA-PNS           | Nasal                                 | Face               |
| BR-PT            | Cranial vault                         | Neurocranium       |
| BR-APET          | Cranial vault                         | Neurocranium       |
| PT-APET          | Cranial vault                         | Neurocranium       |
| PT-BA            | Cranial vault                         | Neurocranium       |
| PT-EAM           | Cranial vault                         | Neurocranium       |
| PT-ZYGO          | Zygomatic                             | Face               |
| PT-TSP           | Cranial vault, Zygomatic              | Neurocranium, Face |
| ZS-ZI            | Oral                                  | Face               |
| ZI-MT            | Oral                                  | Face               |
| ZI-ZYGO          | Zygomatic                             | Face               |
| ZI-TSP           | Zygomatic                             | Face               |
| MT-PNS           | Oral                                  | Face               |
| PNS-APET         | Basicranium                           | Neurocranium       |
| APET-BA          | Basicranium                           | Neurocranium       |
| APET-TS          | Basicranium                           | Neurocranium       |
| BA-EAM           | Basicranium                           | Neurocranium       |
| EAM-ZYGO         | Zygomatic                             | Face               |
| ZYGO-TSP         | Zygomatic                             | Face               |
| LD-AS            | Cranial vault                         | Neurocranium       |
| BR-LD            | Cranial vault                         | Neurocranium       |
| OPI-LD           | Cranial vault                         | Neurocranium       |
| PT-AS            | Cranial vault                         | Neurocranium       |
| JP-AS            | Basicranium                           | Neurocranium       |
| BA-OPI           | Basicranium                           | Neurocranium       |

**Table S6.** Symbols used throughout the text and their descriptions.

| <b>Symbols</b>            | <b>Descriptions</b>                                                                                                                 |
|---------------------------|-------------------------------------------------------------------------------------------------------------------------------------|
| <b>P</b> -matrices        | phenotypic variance-covariance matrices; or the covariance matrices for a terminal taxa in a phylogenetic tree.                     |
| <b>W</b> -matrices        | ancestral within-group covariance matrices for each node of a phylogenetic tree as weighted averages of species <b>P</b> -matrices. |
| ancestor <b>W</b> -matrix | within-group covariance matrix at the root of a phylogenetic tree used as an approximation of the ancestral <b>G</b> .              |
| $\Delta z$                | vector of differences in the averages of any two groups; or the vector of response to selection.                                    |
| <b>B</b>                  | between groups variance-covariance matrix estimated on phylogenetic independent contrasts.                                          |
| <b>G</b>                  | additive genetic variance-covariance matrix.                                                                                        |
| $\beta$                   | selection gradient.                                                                                                                 |
| $t$                       | elapsed time since divergence from the ancestral population in generations.                                                         |
| $N_e$                     | effective size of the evolving populations.                                                                                         |
| $W$                       | eigenvalues of within-group covariance matrices ( <b>W</b> ).                                                                       |
| $b$                       | slope of the regression coefficient.                                                                                                |
| <b>C</b>                  | variance-covariance matrix among selection gradients for the traits.                                                                |

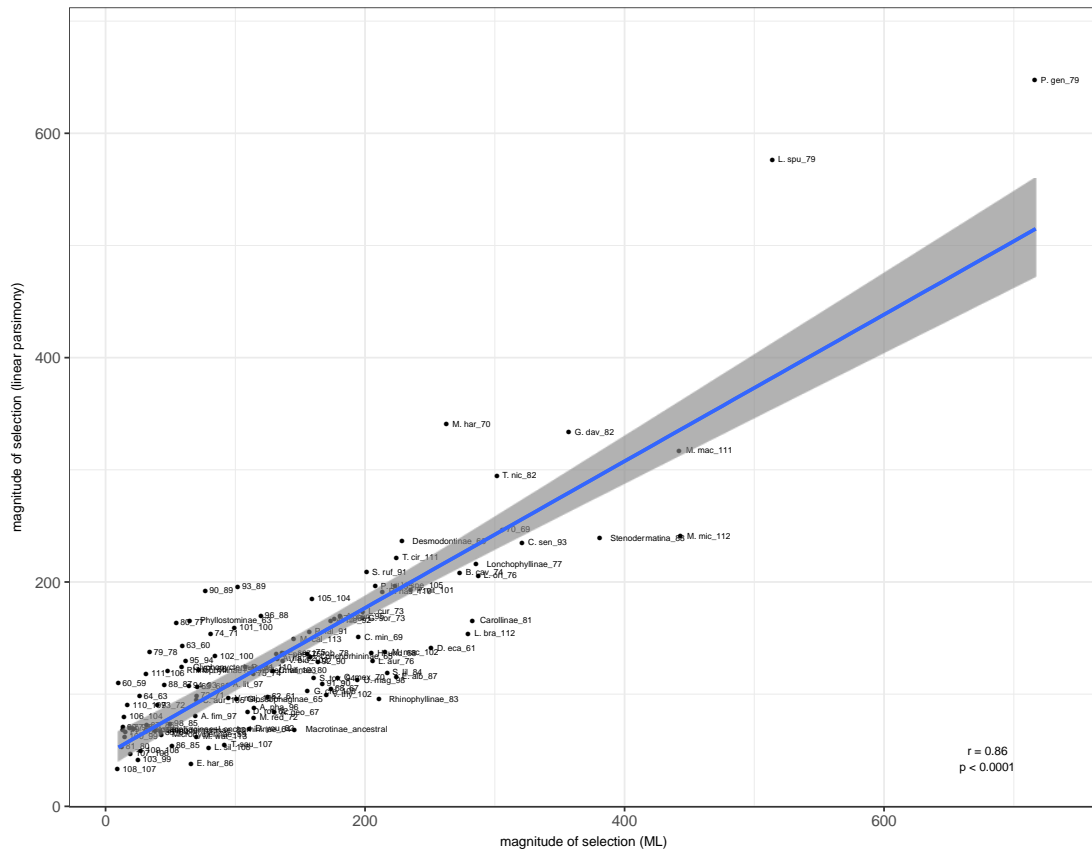

**Figure S7.** Correlation between selection strength values reconstructed based on linear parsimony approach using Mesquite version 3.02<sup>10</sup> and using a maximum likelihood approach<sup>11</sup> (function fastAnc of “phytools” R package<sup>12</sup>).

## References

1. Rojas, D., Warsi, O. M. & Dávalos, L. M. Bats (Chiroptera: Noctilionoidea) Challenge a Recent Origin of Extant Neotropical Diversity. *Syst. Biol.* **65**, 432–448 (2016).
2. Nowak, R. M. & Walker, E. P. *Walker’s bats of the world*. (Johns Hopkins University Press, 1994).
3. Ferrarezi, H. & Gimenez, E. . Systematic patterns and the evolution of feeding habits in Chiroptera (Archonta: Mammalia). *J. Comp. Biol.* **1**, 75–94 (1996).
4. Simmons, N. B. Order Chiroptera. in *Mammal Species of the World: a taxonomic and geographic reference* **1**, 312–529 (2005).

5. Wetterer, A. , Rockman, M. V. & Simmons, N. B. Phylogeny of phyllostomid bats (Mammalia:Chiroptera): data from diverse morphological systems, sex chromosomes, and restriction sites. *Bull. Am. Mus. Nat. Hist.* **248**,
6. Baker, R. J., Bininda-Emonds, O. R. P., Mantilla-Meluk, H., Porter, C. A. & Van Den Bussche, R. A. Molecular time scale of diversification of feeding strategy and morphology in New World Leaf-Nosed Bats (Phyllostomidae): a phylogenetic perspective. in *Evolutionary History of Bats* (eds. Gunnell, G. F. & Simmons, N. B.) 385–409 (Cambridge University Press, 2012).
7. Evans, H. E. & Miller, M. E. *Miller's anatomy of the dog*. (W.B. Saunders, 1993).
8. Giannini, N. P., Wible, J. R. & Simmons, N. B. On the Cranial Osteology of Chiroptera. I. Pteropus (Megachiroptera: Pteropodidae). *Bull. Am. Mus. Nat. Hist.* **295**, 1–134 (2006).
9. *Nomina anatomica veterinaria*. (The Committees ; Distributed by Dept. of Veterinary Anatomy, Cornell University, 1994).
10. Maddison, W. P. & Maddison, D. R. *Mesquite: A modular system for evolutionary analysis Available at: <http://mesquiteproject.org>*. (2015).
11. Schluter, D., Price, T., Mooers, A. O. & Ludwig, D. Likelihood of ancestor states in adaptive radiation. *Evolution* **51**, 1699–1711 (1997).
12. Revell, L. J. phytools: an R package for phylogenetic comparative biology (and other things): phytools: R package. *Methods Ecol. Evol.* **3**, 217–223 (2012).
